# Supplementary material for: Beyond Depression Symptoms: The Default Mode Network as a Predictor of Antidepressant Response
Source: Research Square preprint supplement (doi:10.21203/rs.3.rs-7415752/v1), 2025-09-17
Supplement: Supplementary file 1 [file 4056aabbfe4f1ac078f591d5.docx]

**Supporting Information**


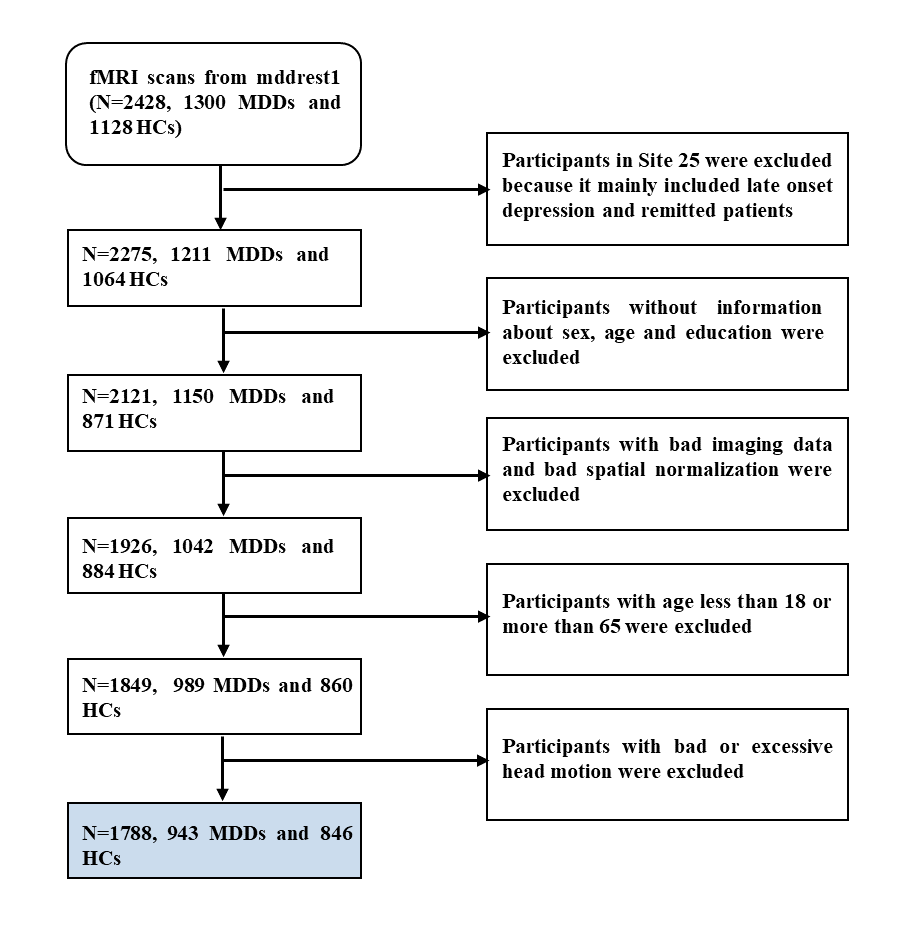


**Figure S1.** Sample Selection of REST-meta-MDD 1. From 2428 subjects, 1788 subjects were selected through above criteria.


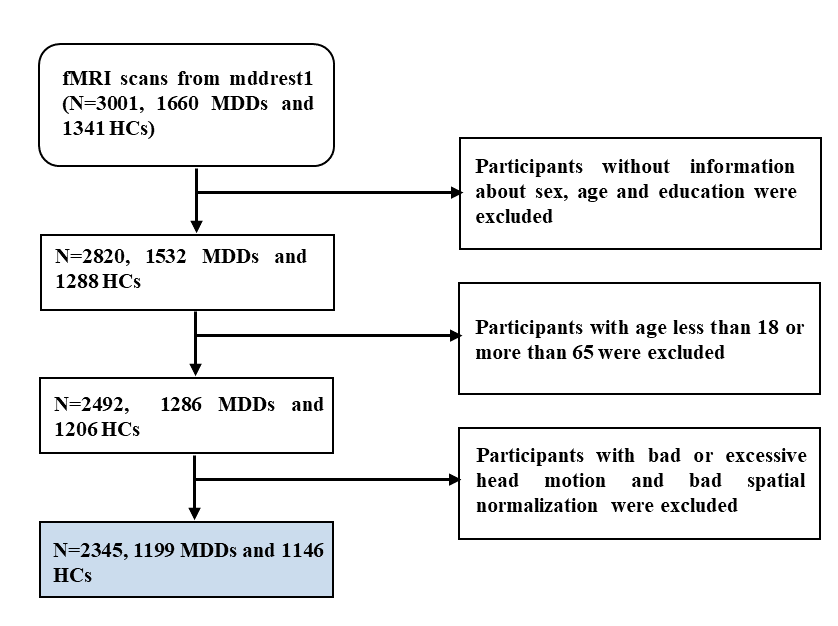


**Figure S2.** Sample Selection of REST-meta-MDD 2. From 3001 subjects, 2345 subjects were selected through above criteria.


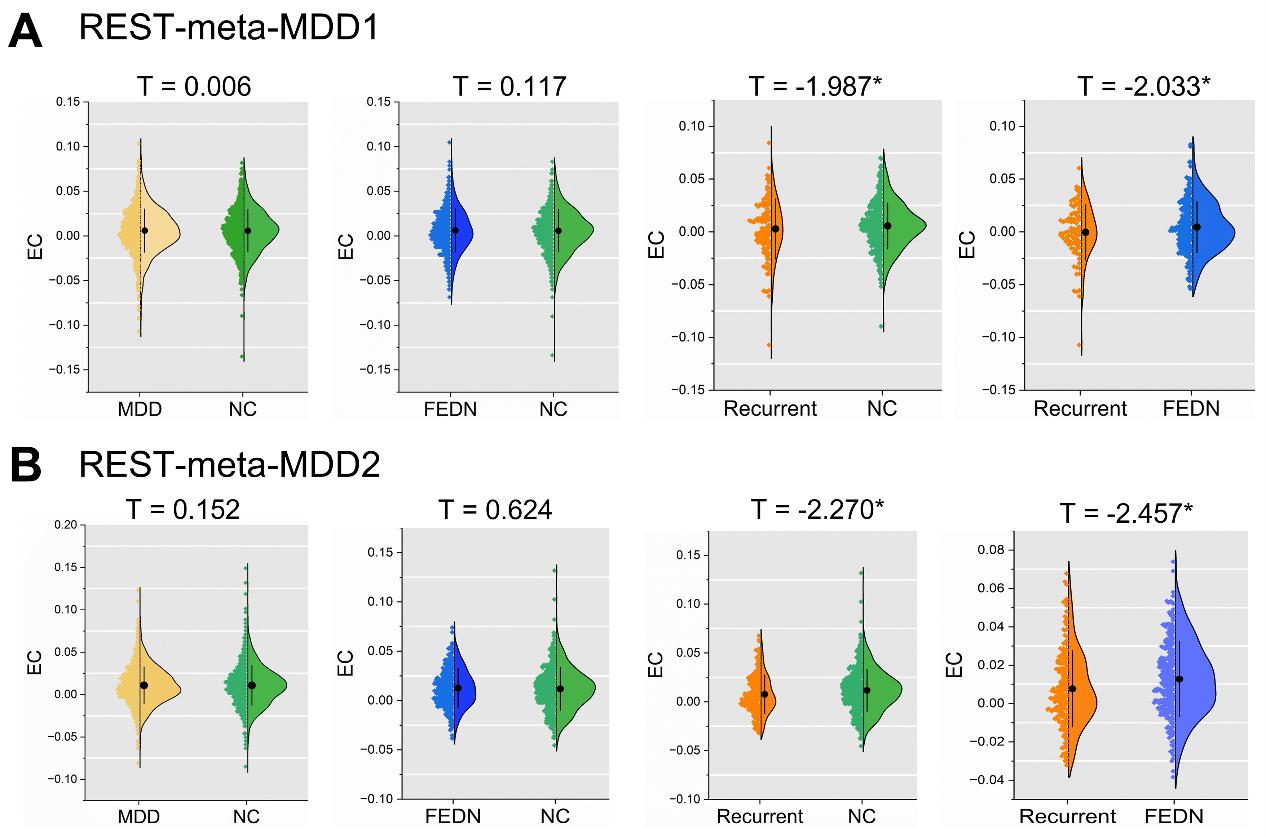


**Figure S3 Reduced EC from mPFC to PCC within DMN in patients with recurrent MDD.** (A) Violin plots depict the distribution of mean EC from mPFC to PCC differences among various groups in REST-meta-MDD 1. B Violin plots depict the distribution of mean EC from mPFC to PCC differences among various groups in REST-meta-MDD 2. It is noteworthy that, for each comparison, only sites with a sample size larger than 10 in each group were considered. The *t* values represent the statistics for these comparisons in Linear Mixed-Effects Model (LMM) analyses. FEDN, First Episode Drug Naïve. **p* < 0.05; ***p* < 0.01.
